# Supplementary material for: Shaping fungal communities in Cenchrus setaceus: host fitness and habitat filtering
Source: Research Square preprint supplement (doi:10.21203/rs.3.rs-7233707/v1), 2025-07-31
Supplement: Supplementary file 1 [file 6bfffc27d0e422c7f56d1fcc.docx]

Supplementary Material

Shaping fungal communities in *Cenchrus setaceus*: host fitness and habitat filtering

**Andreea Cosoveanu1,2, Mario A. González-Carracedo3, Jorge Sopena Lasala1, José A. Pérez Pérez3, Raimundo Cabrera1***

1 Department of Botany, Ecology and Plant Physiology, Faculty of Sciences, Section Biology, Universidad de La Laguna, 38206 La Laguna, Tenerife, Spain.

2 Gabinete de Estudios Ambientales (GEA), S.L.U, 38659, Tenerife, Canary Islands, Spain.

3 Department of Biochemistry, Microbiology, Cellular Biology and Genetics, Faculty of Sciences, Section Biology, Universidad de La Laguna, 38206 La Laguna, Tenerife, Spain.

* Correspondence: rcabrera@ull.edu.esacosovea@ull.edu.es

Original Article submitted to Microbial Ecology

| Table S1 Cluster counts based on the SCATA cluster representatives and subsequent BLAST identification per genus per mock sample (n = 7). The Spearman correlation coefficient (ρ) compares the observed genus rank distribution with the expected uniform rank (equal input across four genera). Values: ~ 1 – perfect agreement with expected ranks; ~ 0 – no rank correlation; negative values reflect deviation in recovery across genera | | | | | | |
| --- | --- | --- | --- | --- | --- | --- |
| Sample | *Fusarium* | *Botrytis* | *Aplosporella* | *Alternaria* | Other | Spearman (*p*) |
| 1 | 14 | 11 | 1 | 13 | 0 | -0.4 |
| 2 | 45 | 46 | 12 | 42 | 0 | -0.6 |
| 3 | 20 | 12 | 3 | 12 | 0 | -0.6 |
| 4 | 55 | 30 | 14 | 44 | 1 | -0.4 |
| 5 | 22 | 11 | 7 | 16 | 1 | -0.4 |
| 6 | 2 | 4 | 1 | 1 | 0 | -0.7 |
| 7 | 12 | 13 | 4 | 11 | 0 | -0.6 |

|  |
| --- |
| **Fig. S1** Observed rank of each genus per mock sample based on the number of SCATA cluster representatives. A lower rank (closer to 1) indicates higher relative representation. The red dashed line (2.5) indicates the expected rank under equal DNA input across the four genera (ideal recovery). Deviation from this line reflects recovery biases in either amplification or taxonomic (above = underrepresented, below = overrepresented) |

|  |
| --- |
| **Fig. S2** Rarefaction curves representing 49 Fitness × Location groups from both islands (TF – Tenerife, LP – La Palma). The x-axis shows the number of sequences (minimum threshold = 10) and the y-axis shows the number of detected genera (minimum threshold = 2) |

| Table S2 Genera calculated with indicator species analysis grouped within zone x fitness, per island. Values represent: A – specificity (probability that a genus belongs to the group), B – fidelity (probability of finding the genera in sites belonging to the group), stat – InDVal.g (overall indicator, geometric mean of A and B) and assigned ecological guilds. Only genera with p < 0.05 based on permutations are shown as ISA. | | | | | | |
| --- | --- | --- | --- | --- | --- | --- |
| Genus | Zone x Fitness | Island | A | B | stat | Guild |
| *Trimmatostroma* | Coast_N x High | TF | 0.67 | 0.4 | 0.52 | Pathogen_Lichen |
| *Toxicocladosporium* | Coast_N x High | TF | 0.30 | 0.78 | 0.48 | Endophyte |
| *Verrucocladosporium* | Coast_N x High | TF | 0.39 | 0.48 | 0.43 | Pathogen_Lichen |
| *Hortaea* | Coast_N x High | TF | 0.41 | 0.37 | 0.39 | Pathogen |
| *Didymocyrtis* | Coast_N x High | TF | 0.40 | 0.33 | 0.36 | Pathogen |
| *Stenella* | Coast_S x Low | TF | 0.77 | 0.33 | 0.51 | Pathogen |
| *Eupenidiella* | Coast_S x Low | TF | 0.48 | 0.46 | 0.48 | Pathogen_Animal |
| *Ramimonilia* | Coast_S x Low | TF | 0.64 | 0.22 | 0.38 | Saprotroph |
| *Symmetrospora* | Hill_N x High | TF | 0.37 | 0.91 | 0.58 | Saprotroph |
| *Erythrobasidium* | Hill_N x High | TF | 0.86 | 0.36 | 0.56 | Saprotroph |
| *Filobasidium* | Hill_N x High | TF | 0.32 | 0.82 | 0.51 | Saprotroph |
| *Vishniacozyma* | Hill_N x High | TF | 0.34 | 0.73 | 0.5 | Saprotroph |
| *Dioszegia* | Hill_N x High | TF | 0.37 | 0.55 | 0.45 | Saprotroph |
| *Kondoa* | Hill_N x High | TF | 0.44 | 0.45 | 0.45 | Saprotroph |
| *Xenoramularia* | Hill_N x High | TF | 1 | 0.19 | 0.43 | Pathogen |
| *Kalmanozyma* | Hill_N x High | TF | 0.8 | 0.18 | 0.38 | Saprotroph |
| *Allophoma* | Hill_N x Low | TF | 0.82 | 0.36 | 0.55 | Pathogen |
| *Phaeosphaeria* | Hill_N x Low | TF | 0.23 | 0.82 | 0.49 | Pathogen |
| *Didymella* | Hill_N x Low | TF | 0.27 | 0.73 | 0.45 | Pathogen |
| *Nigrospora* | Hill_N x Low | TF | 0.40 | 0.45 | 0.43 | Saprotroph |
| *Neodevriesia* | Hill_N x Low | TF | 0.49 | 0.36 | 0.42 | Pathogen |
| *Nothophoma* | Hill_N x Low | TF | 0.37 | 0.45 | 0.41 | Saprotroph |
| *Paraphaeosphaeria* | Hill_N x Low | TF | 0.56 | 0.27 | 0.39 | Saprotroph |
| *Neodidymelliopsis* | Hill_N x Low | TF | 0.8 | 0.18 | 0.38 | Saprotroph |
| *Parastagonospora* | Hill_N x Low | TF | 0.47 | 0.27 | 0.36 | Pathogen |
| *Epicoccum* | Hill_N x Low | TF | 0.34 | 0.36 | 0.35 | Endophyte |
| *Calophoma* | Hill_N x Low | TF | 0.56 | 0.18 | 0.32 | Pathogen |
| *Cryptococcus* | Hill_S x High | TF | 1 | 0.09 | 0.30 | Pathogen |
| *Davidiellomyces* | Hill_S x Low | TF | 0.45 | 0.38 | 0.41 | Saprotroph |
| *Pseudoseptoria* | Hill_S x Low | TF | 0.37 | 0.46 | 0.41 | Pathogen |
| *Hormonema* | Hill_S x Low | TF | 0.20 | 0.83 | 0.41 | Saprotroph |
| *Staurosphaeria* | Hill_S x Low | TF | 0.63 | 0.25 | 0.4 | Saprotroph |
| *Neostagonospora* | Hill_S x Low | TF | 0.53 | 0.29 | 0.39 | Saprotroph |
| *Gobabebomyces* | Hill_S x Low | TF | 0.9 | 0.17 | 0.39 | na |
| *Selenophoma* | Hill_S x Low | TF | 0.35 | 0.38 | 0.36 | Saprotroph |
| *Saxophila* | Hill_S x Low | TF | 1 | 0.13 | 0.35 | Saprotroph |
| *Buckleyzyma* | Coast_E x High | LP | 0.55 | 0.4 | 0.47 | Saprotroph |
| *Phaeococcomyces* | Coast_E x Low | LP | 0.58 | 0.89 | 0.72 | Saprotroph |
| *Vanderaaea* | Coast_E x Low | LP | 0.77 | 0.56 | 0.65 | na |
| *Ramimonilia* | Coast_E x Low | LP | 0.78 | 0.44 | 0.59 | Saprotroph |
| *Cippumomyces* | Coast_E x Low | LP | 1 | 0.33 | 0.58 | na |
| *Staurosphaeria* | Coast_E x Low | LP | 0.8 | 0.33 | 0.52 | Saprotroph |
| *Hormonema* | Coast_E x Low | LP | 0.22 | 1 | 0.47 | Saprotroph |
| *Didymocyrtis* | Coast_W x Low | LP | 0.53 | 0.75 | 0.63 | Pathogen |
| *Comoclathris* | Coast_W x Low | LP | 0.69 | 0.38 | 0.51 | Saprotroph |
| *Stagonosporopsis* | Coast_W x Low | LP | 1 | 0.25 | 0.5 | Pathogen |
| *Neosetophoma* | Coast_W x Low | LP | 0.53 | 0.38 | 0.45 | Endophyte |
| *Hannaella* | Hill_E x High | LP | 1 | 0.33 | 0.58 | Pathogen_Animal |
| *Vishniacozyma* | Hill_E x High | LP | 0.44 | 0.67 | 0.54 | Saprotroph |
| *Genolevuria* | Hill_E x High | LP | 1 | 0.25 | 0.5 | Saprotroph |
| *Symmetrospora* | Hill_E x High | LP | 0.32 | 0.67 | 0.47 | Saprotroph |
| *Selenophoma* | Hill_E x Low | LP | 0.59 | 0.83 | 0.7 | Saprotroph |
| *Neodevriesia* | Hill_E x Low | LP | 0.83 | 0.42 | 0.59 | Pathogen |
| *Phaeosphaeria* | Hill_E x Low | LP | 0.4 | 0.67 | 0.51 | Endophyte |
| *Pseudoseptoria* | Hill_E x Low | LP | 0.35 | 0.75 | 0.51 | Pathogen |
| *Cladosporium* | Hill_E x Low | LP | 0.26 | 1 | 0.51 | Pathogen |
| *Toxicocladosporium* | Hill_E x Low | LP | 0.25 | 1 | 0.5 | Endophyte |
| *Neostagonospora* | Hill_E x Low | LP | 0.67 | 0.33 | 0.47 | Saprotroph |
| *Verrucocladosporium* | Hill_E x Low | LP | 0.38 | 0.58 | 0.47 | Pathogen_Lichen |
| *Alternaria* | Hill_W x Low | LP | 0.25 | 0.89 | 0.47 | Pathogen |

| Table S3 Guilds grouped and assigned to known genera from “dominant fungal community” per location x zone in La Palma. Values are expressed as relative abundances of guilds of genera exceeding the frequency threshold (>3%), with unclassified and rare grouped taxa (“Other) included only for the total relative abundance. | | | |
| --- | --- | --- | --- |
| Zone | Fitness | Guild_Primary | Relative Abundance % |
| Coast_E | High | Endophyte | 16.67 |
| Coast_E | High | Pathogen | 33.33 |
| Coast_E | High | Pathogen_Fungi | 4.17 |
| Coast_E | High | Saprotroph | 45.83 |
| Coast_E | Low | Endophyte | 11.25 |
| Coast_E | Low | Pathogen | 15.00 |
| Coast_E | Low | Saprotroph | 30.00 |
| Coast_W | High | Endophyte | 7.69 |
| Coast_W | High | Pathogen | 61.54 |
| Coast_W | High | Saprotroph | 30.77 |
| Coast_W | Low | Endophyte | 16.88 |
| Coast_W | Low | Pathogen | 20.78 |
| Coast_W | Low | Pathogen_Lichen | 7.79 |
| Coast_W | Low | Saprotroph | 9.09 |
| Hill_E | High | Endophyte | 8.02 |
| Hill_E | High | Pathogen | 14.81 |
| Hill_E | High | Pathogen_Fungi | 3.09 |
| Hill_E | High | Saprotroph | 17.90 |
| Hill_E | Low | Endophyte | 11.43 |
| Hill_E | Low | Pathogen | 26.29 |
| Hill_E | Low | Pathogen_Lichen | 4.00 |
| Hill_E | Low | Saprotroph | 12.57 |
| Hill_W | High | Pathogen | 37.50 |
| Hill_W | High | Pathogen_Fungi | 5.00 |
| Hill_W | High | Saprotroph | 7.50 |
| Hill_W | Low | Endophyte | 4.49 |
| Hill_W | Low | Pathogen | 39.33 |
| Hill_W | Low | Pathogen_Lichen | 3.37 |
| Hill_W | Low | Saprotroph | 15.73 |

| Table S4 Guilds grouped and assigned to known genera from “dominant fungal community” per location x zone in Tenerife. Values are expressed as relative abundances of guilds of genera exceeding the frequency threshold (>2%), with unclassified and rare grouped taxa (“Other) included only for the total relative abundance. | | | |
| --- | --- | --- | --- |
| Zone | Fitness | Guild_Primary | Relative Abundance % |
| Coast_N | High | Endophyte | 6.54 |
| Coast_N | High | Pathogen | 31.78 |
| Coast_N | High | Pathogen_Fungi | 3.74 |
| Coast_N | High | Saprotroph | 29.91 |
| Coast_N | Low | Endophyte | 13.57 |
| Coast_N | Low | Pathogen | 32.95 |
| Coast_N | Low | Pathogen_Lichen | 9.30 |
| Coast_N | Low | Saprotroph | 11.24 |
| Coast_S | High | Endophyte | 2.70 |
| Coast_S | High | Pathogen | 35.81 |
| Coast_S | High | Pathogen_Animal | 7.43 |
| Coast_S | High | Pathogen_Fungi | 5.41 |
| Coast_S | High | Pathogen_Lichen | 2.70 |
| Coast_S | High | Saprotroph | 27.03 |
| Coast_S | Low | Endophyte | 7.01 |
| Coast_S | Low | Pathogen | 29.21 |
| Coast_S | Low | Pathogen_Animal | 5.84 |
| Coast_S | Low | Saprotroph | 10.51 |
| Hill_N | High | Endophyte | 5.41 |
| Hill_N | High | Pathogen | 18.92 |
| Hill_N | High | Saprotroph | 37.84 |
| Hill_N | Low | Endophyte | 12.50 |
| Hill_N | Low | Pathogen | 29.41 |
| Hill_N | Low | Saprotroph | 23.53 |
| Hill_S | High | Endophyte | 3.21 |
| Hill_S | High | Pathogen | 25.64 |
| Hill_S | High | Saprotroph | 26.28 |
| Hill_S | Low | Endophyte | 9.69 |
| Hill_S | Low | Pathogen | 28.29 |
| Hill_S | Low | Pathogen_Lichen | 2.33 |
| Hill_S | Low | Saprotroph | 22.48 |

| Table S5 Diversity indices Shannon and Hill0 values per group – island (TF – Tenerife, LP – La Palma), fitness level (high/low) and orientation (TF: N/S, LP: E/W). Lowercase letters indicate significant differences between groups with comparisons only within island (Dunn test, p < 0.05). Groups are: i) coast versus hill of the same orientation, ii) same fitness level between hill vs. coast, iii) low versus high fitness. | | | |
| --- | --- | --- | --- |
| Island | Group | Shannon | Hill0 |
| LP | Coast_E | 2.4 a | 40 a |
| LP | Coast_W | 2.8 ab | 40 a |
| LP | Hill_E | 3.2 c | 88 c |
| LP | Hill_W | 2.3 a | 41 ab |
| LP | High | 3.3 a | 76 a |
| LP | Low | 3 b | 94 b |
| LP | High_Coast_E | 2.2 a | 14 a |
| LP | High_Coast_W | 1.6 a | 0.3 |
| LP | High_Hill_E | 3.3 d | 64 d |
| LP | High_Hill_W | 2.4 ab | 26 b |
| LP | Low_Coast_E | 2.3 ab | 33 bc |
| LP | Low_Coast_W | 2.8 bc | 38 c |
| LP | Low_Hill_E | 2.8 bc | 55 d |
| LP | Low_Hill_W | 2.2 a | 35 bc |
| TF | Coast_N | 3 a | 76 ab |
| TF | Coast_S | 3.3 a | 98 b |
| TF | Hill_N | 3.2 a | 83 ab |
| TF | Hill_S | 3.2 a | 90 a |
| TF | High | 3.1 a | 95 a |
| TF | Low | 3.3 b | 146 b |
| TF | High_Coast_N | 2.8 a | 37 a |
| TF | High_Coast_S | 2.6 a | 36 a |
| TF | High_Hill_N | 2.8 a | 46 ab |
| TF | High_Hill_S | 3.1 ab | 59 bc |
| TF | Low_Coast_N | 2.8 a | 62 c |
| TF | Low_Coast_S | 3.2 b | 89 d |
| TF | Low_Hill_N | 2.9 ab | 59 bc |
| TF | Low_Hill_S | 3 ab | 63 cd |
